# Supplementary material
Source: PubMed Central journal article supplement (PMC7903923)
Supplement: NIHMS1666591-supplement-Supplemental.pdf [file NIHMS1666591-supplement-Supplemental.pdf]

**Supplementary Table 1** Distribution of person-years (PY) and deaths from solid cancer and leukemia, by birth cohort, attained age, calendar period, and gender for the Life Span Study (LSS) and INWORKS subsets used for comparison

|                     | Male   |                          |                      |         |                          |                      | Female |                          |                      |         |                          |                      |
|---------------------|--------|--------------------------|----------------------|---------|--------------------------|----------------------|--------|--------------------------|----------------------|---------|--------------------------|----------------------|
|                     | LSS    |                          |                      | INWORKS |                          |                      | LSS    |                          |                      | INWORKS |                          |                      |
|                     | PY     | Deaths from solid cancer | Deaths from leukemia | PY      | Deaths from solid cancer | Deaths from leukemia | PY     | Deaths from solid cancer | Deaths from leukemia | PY      | Deaths from solid cancer | Deaths from leukemia |
| <b>Birth cohort</b> |        |                          |                      |         |                          |                      |        |                          |                      |         |                          |                      |
| 1886-1895           | 67191  | 727                      | 14                   | 12990   | 126                      | 4                    | 91149  | 625                      | 11                   | 1048    | 5                        | 0                    |
| 1896-1905           | 139065 | 1259                     | 30                   | 91678   | 880                      | 24                   | 226193 | 1305                     | 28                   | 9492    | 51                       | 2                    |
| 1906-1915           | 132381 | 962                      | 31                   | 372257  | 3102                     | 73                   | 330328 | 1516                     | 30                   | 43659   | 182                      | 4                    |
| 1916-1925           | 100458 | 527                      | 19                   | 987367  | 5102                     | 138                  | 393572 | 1061                     | 33                   | 118197  | 445                      | 12                   |
| 1926-1935           | -      | -                        | -                    | 1384828 | 3940                     | 101                  | -      | -                        | -                    | 163091  | 385                      | 19                   |
| 1936-1945           | -      | -                        | -                    | 1150201 | 1337                     | 45                   | -      | -                        | -                    | 146427  | 167                      | 8                    |
| 1946-1955           | -      | -                        | -                    | 926907  | 392                      | 20                   | -      | -                        | -                    | 144597  | 79                       | 3                    |
| 1956-1965           | -      | -                        | -                    | 482816  | 65                       | 10                   | -      | -                        | -                    | 80286   | 19                       | 0                    |
| 1966+               | -      | -                        | -                    | 50019   | 2                        | 1                    | -      | -                        | -                    | 12460   | 0                        | 0                    |
| <b>Attained age</b> |        |                          |                      |         |                          |                      |        |                          |                      |         |                          |                      |
| <30                 | 2275   | 0                        | 1                    | 170896  | 9                        | 2                    | 11095  | 0                        | 1                    | 32343   | 1                        | 0                    |
| 30-39               | 23602  | 5                        | 3                    | 1166250 | 142                      | 21                   | 81900  | 36                       | 4                    | 164452  | 31                       | 3                    |
| 40-49               | 61007  | 55                       | 7                    | 1495910 | 764                      | 43                   | 160362 | 181                      | 13                   | 189547  | 120                      | 5                    |
| 50-59               | 108729 | 345                      | 15                   | 1282403 | 2519                     | 74                   | 226026 | 535                      | 10                   | 158992  | 260                      | 8                    |
| 60-69               | 123685 | 989                      | 24                   | 872272  | 5079                     | 115                  | 247718 | 911                      | 28                   | 106110  | 394                      | 17                   |
| 70-79               | 84276  | 1268                     | 27                   | 388602  | 4649                     | 112                  | 204294 | 1451                     | 24                   | 52687   | 375                      | 11                   |
| 80-89               | 31772  | 706                      | 15                   | 78481   | 1675                     | 46                   | 94843  | 1130                     | 20                   | 13812   | 139                      | 4                    |
| 90+                 | 3750   | 107                      | 2                    | 4247    | 109                      | 3                    | 15003  | 263                      | 2                    | 1313    | 13                       | 0                    |
| <b>Period</b>       |        |                          |                      |         |                          |                      |        |                          |                      |         |                          |                      |
| 1950-1960           | 156022 | 499                      | 26                   | 155332  | 113                      | 3                    | 287689 | 500                      | 20                   | 21025   | 4                        | 1                    |
| 1961-1970           | 121193 | 782                      | 10                   | 548784  | 639                      | 28                   | 253047 | 791                      | 21                   | 58449   | 45                       | 2                    |
| 1971-1980           | 84651  | 868                      | 25                   | 1042436 | 1972                     | 64                   | 212018 | 979                      | 22                   | 113406  | 154                      | 6                    |
| 1981-1990           | 49983  | 746                      | 22                   | 1458340 | 3960                     | 112                  | 160501 | 1053                     | 19                   | 185019  | 289                      | 12                   |
| 1991-2000           | 23667  | 487                      | 10                   | 1773110 | 6205                     | 138                  | 106304 | 941                      | 14                   | 248492  | 574                      | 17                   |
| 2001+               | 3580   | 93                       | 1                    | 481060  | 2057                     | 71                   | 21683  | 243                      | 6                    | 92865   | 267                      | 10                   |
